# Supplementary figures and images for: Imaging the fate of histone Cse4 reveals de novo replacement in S phase and subsequent stable residence at centromeres
Source: eLife journal article supplement (doi:10.7554/elife.02203), 2014-05-20

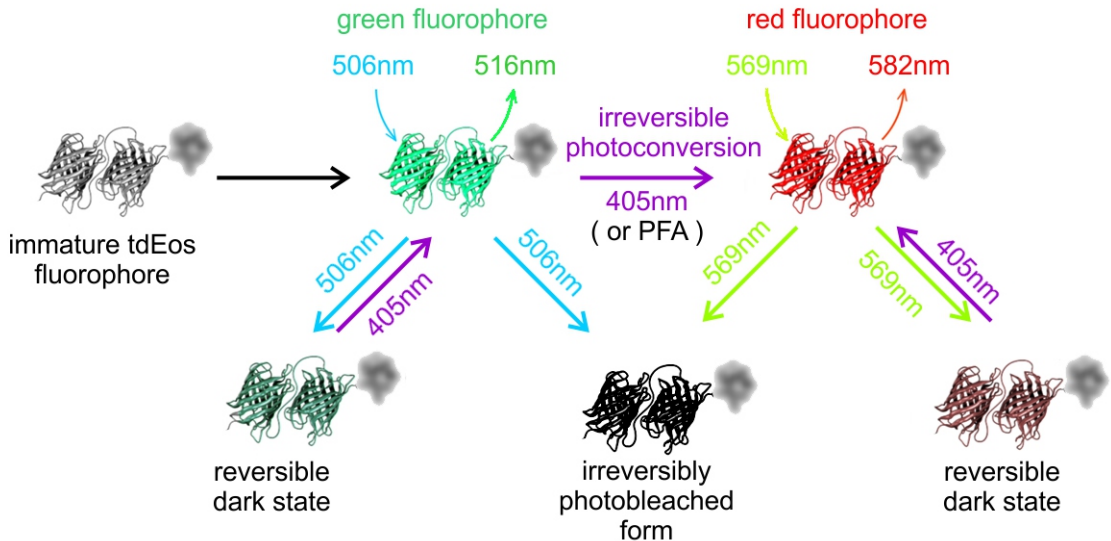

Supplement: supp [file elife-02203-supp-v1.zip]

**A**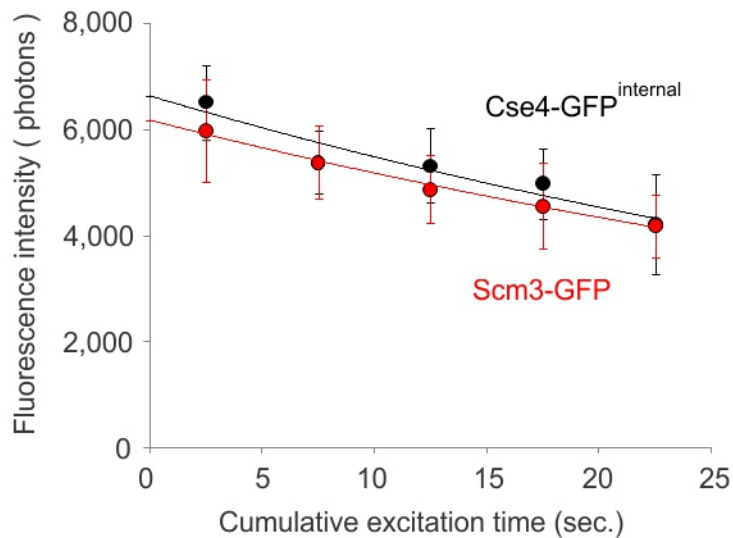**B**

Cse4-GFP<sup>internal</sup>

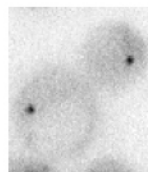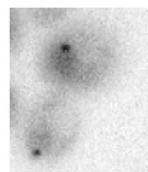

Scm3-GFP

Supplement: supp [file elife-02203-supp-v1.zip]

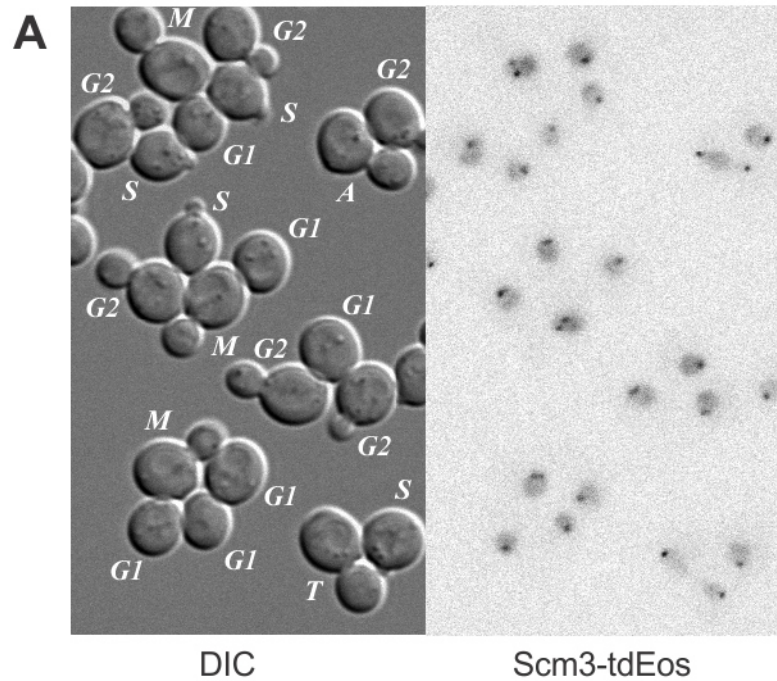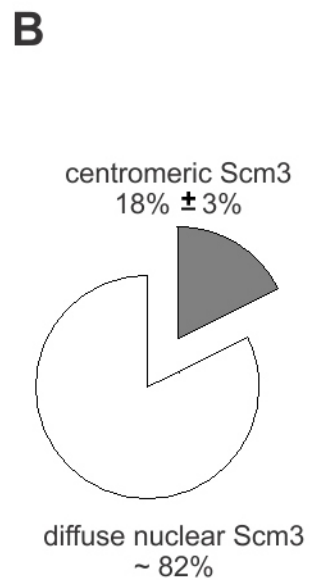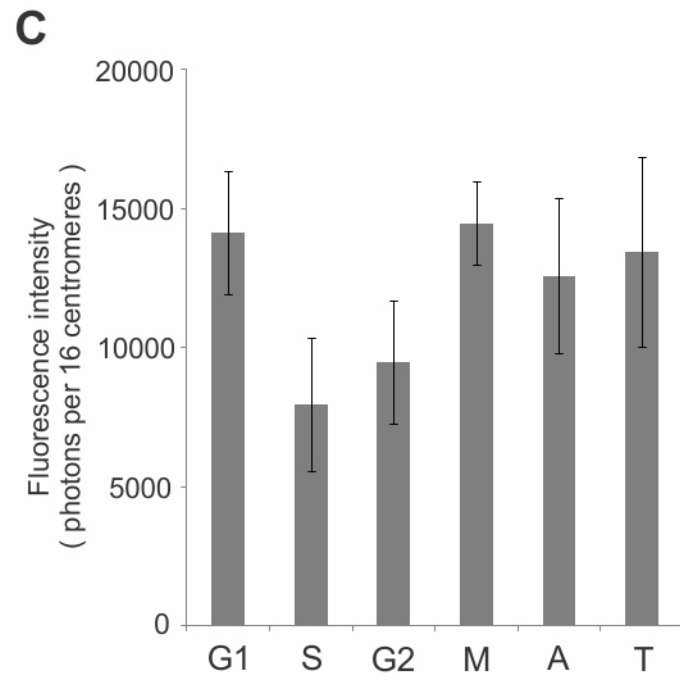

Supplement: supp [file elife-02203-supp-v1.zip]

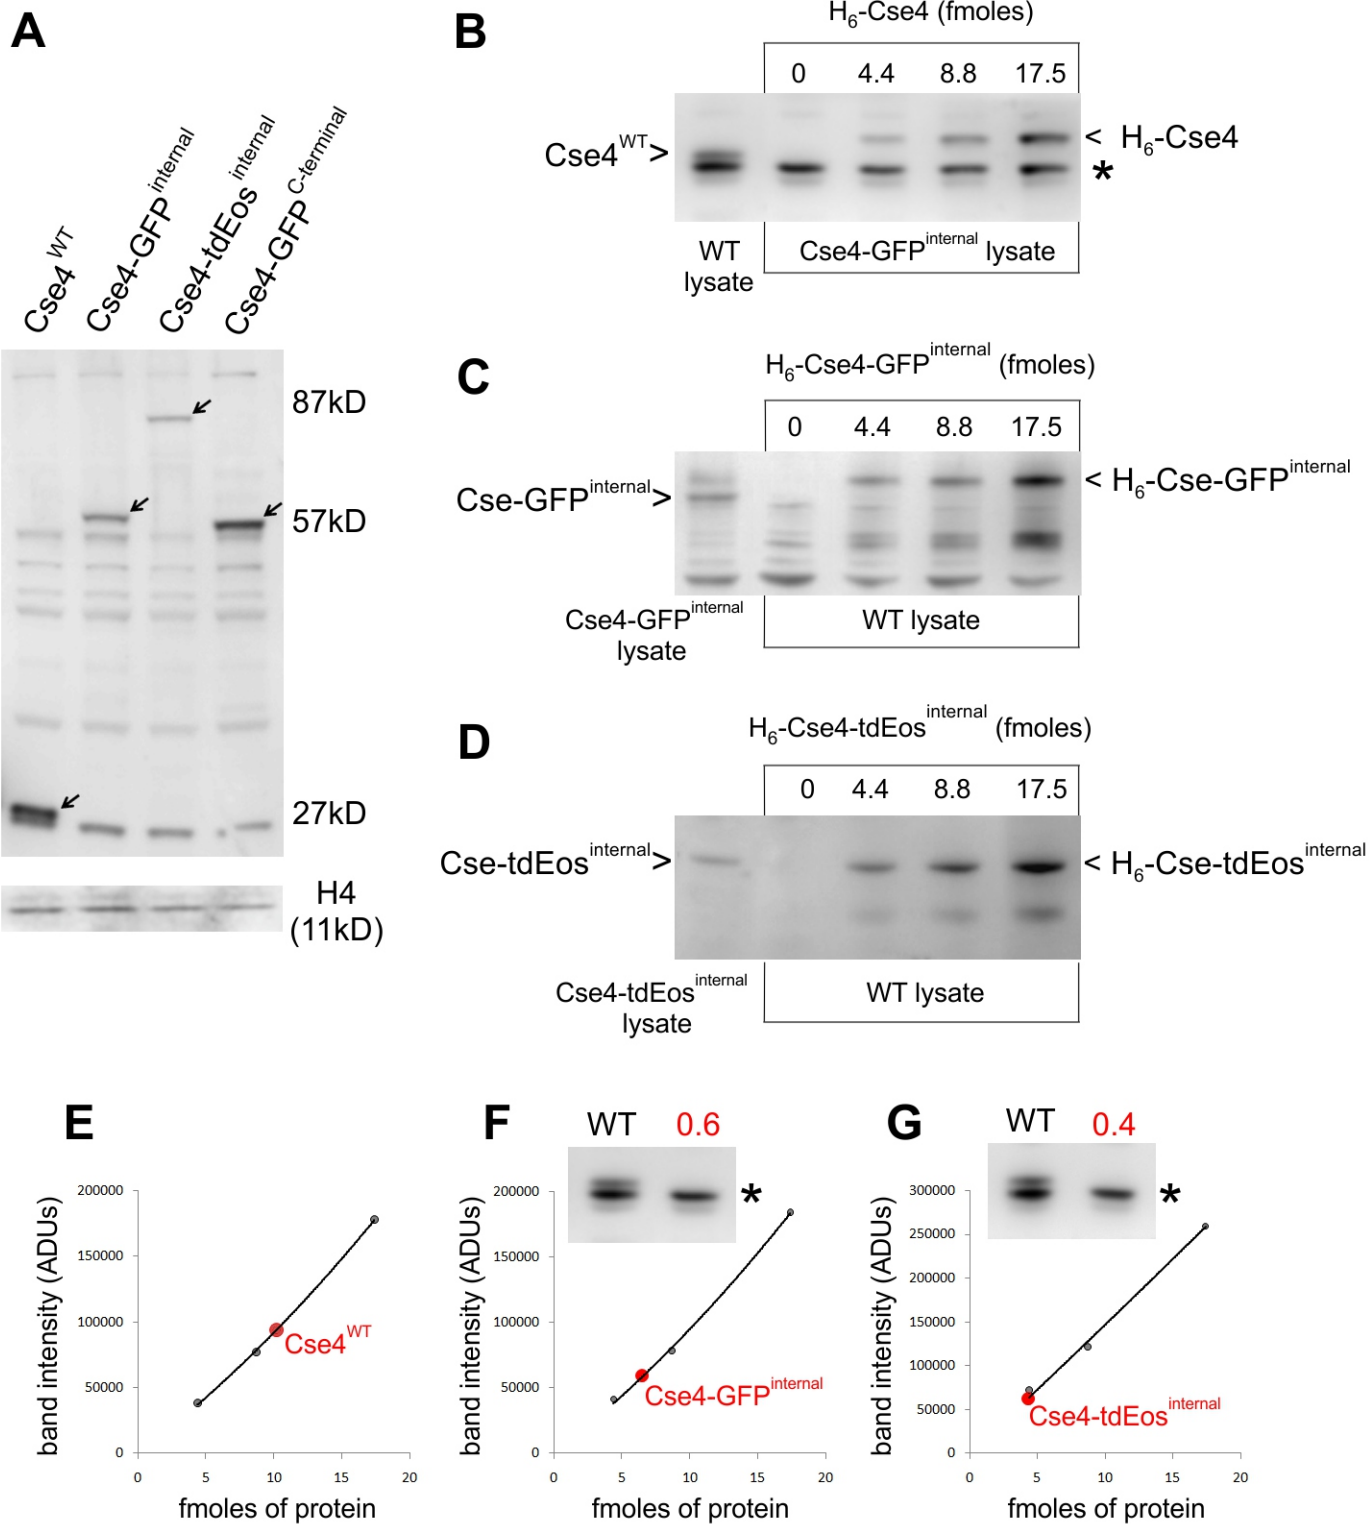

Supplement: supp [file elife-02203-supp-v1.zip]

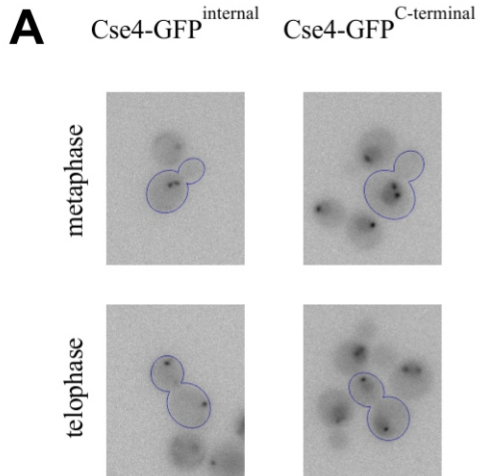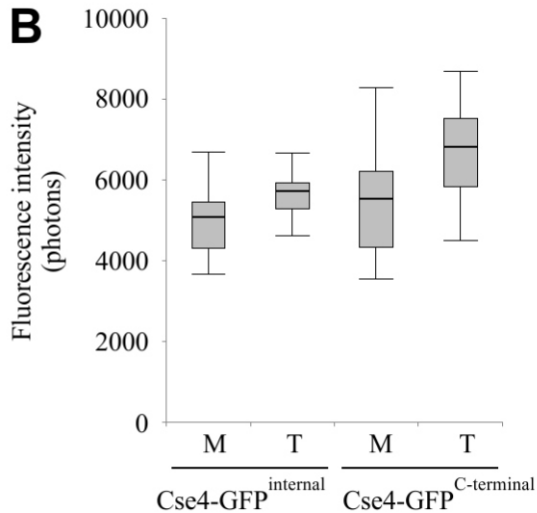

Supplement: supp [file elife-02203-supp-v1.zip]

**A**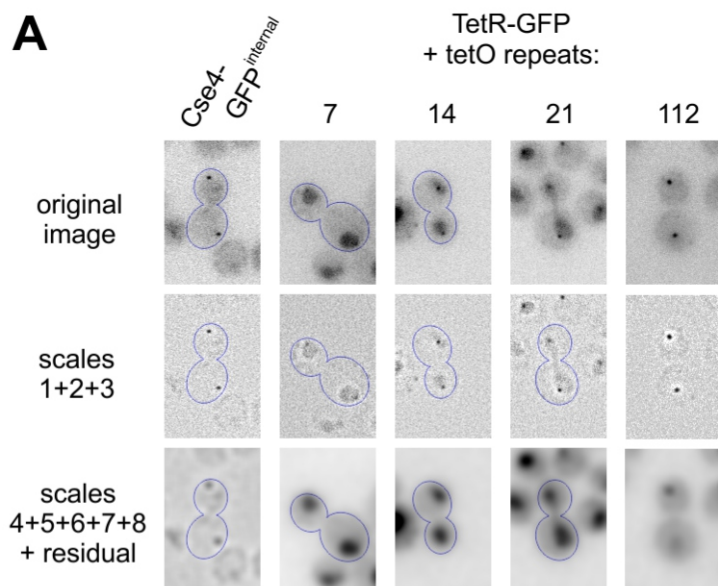**B**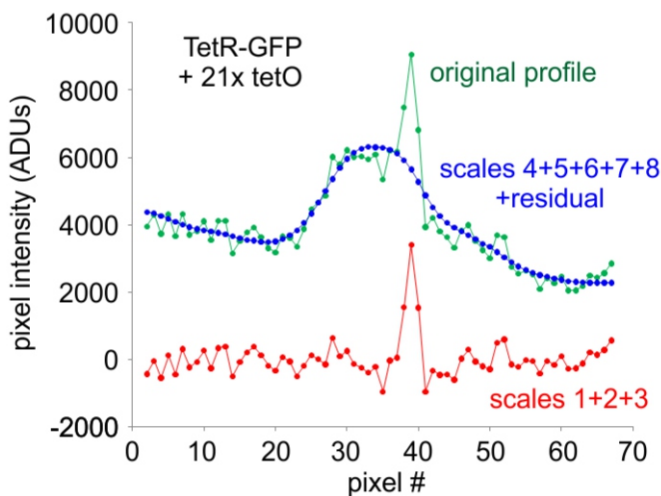**C**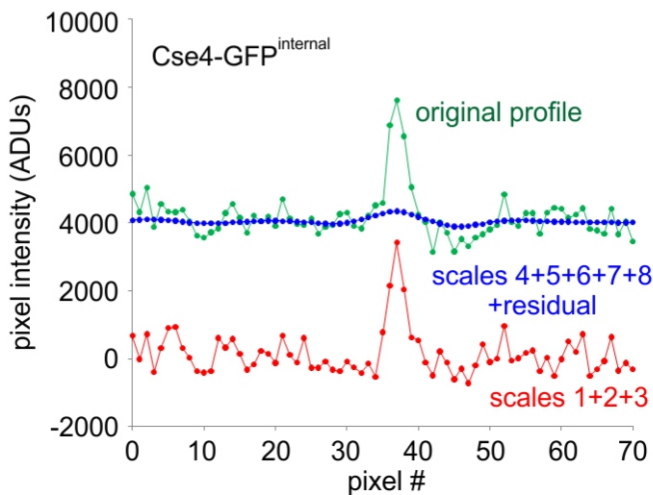

Supplement: supp [file elife-02203-supp-v1.zip]
